# Supplementary material
Source: PubMed Central journal article supplement (PMC7137398)
Supplement: NIHMS1545034-supplement-1.pdf [file NIHMS1545034-supplement-1.pdf]

1 Supplementary Materials for

2  
3 ***N*<sup>6</sup>-methyladenosine modification enables viral RNA to escape recognition**  
4 **by RNA sensor RIG-I**

5  
6 Mijia Lu<sup>1¶</sup>, Zijie Zhang<sup>2¶</sup>, Miaoge Xue<sup>1</sup>, Boxuan Simen Zhao<sup>2</sup>, Olivia Harder<sup>1</sup>, Anzhong Li<sup>1</sup>,  
7 Xueya Liang<sup>1</sup>, Thomas Z. Gao<sup>1</sup>, Yunsheng Xu<sup>3</sup>, Jiyong Zhou<sup>4</sup>, Zongdi Feng<sup>5,6</sup>, Stefan Niewiesk<sup>1</sup>,  
8 Mark E. Peeples<sup>5,6</sup>, Chuan He<sup>2,7</sup>, Jianrong Li<sup>1\*</sup>

9 \* Corresponding author: [li.926@osu.edu](mailto:li.926@osu.edu)

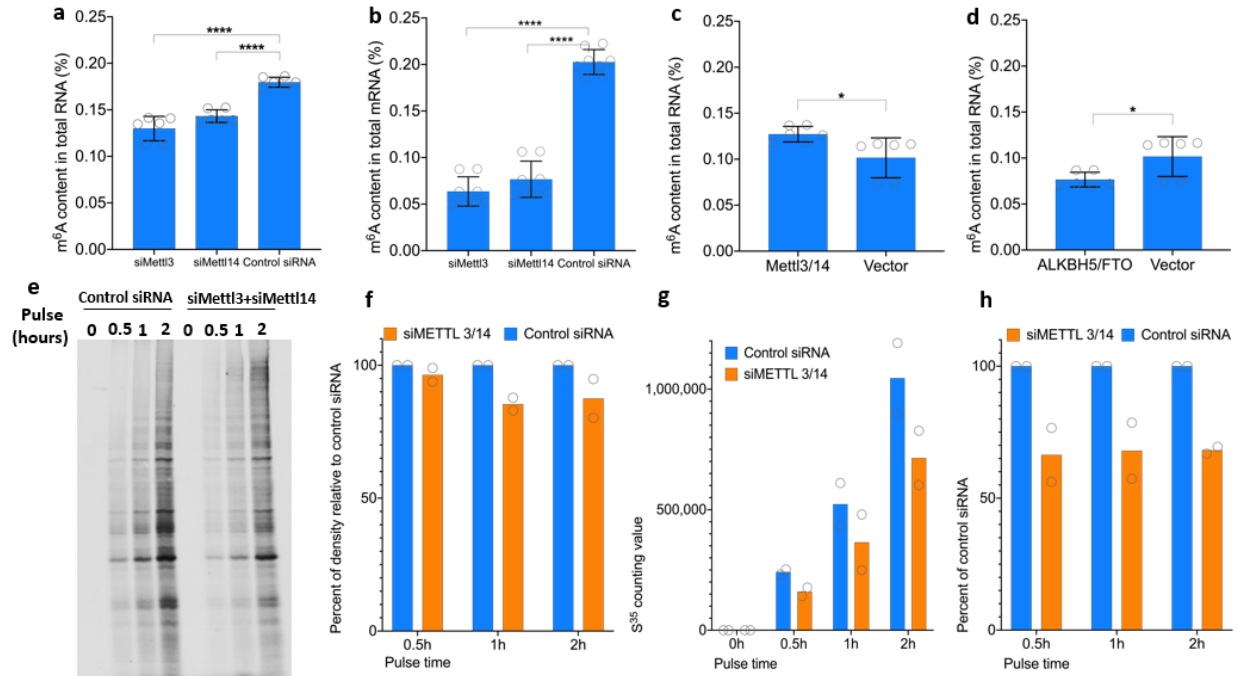

25

26 **Supplementary Fig.1. The effects of writer and eraser proteins on host RNA m<sup>6</sup>A**  
 27 **methylation and host mRNA translation. (a) The effects of knockdown of writer proteins**  
 28 **on total host RNA.** A549 cells were transfected with siRNA targeting METTL3 and METTL14  
 29 or control siRNA. At 24 h post-transfection, total RNA was extracted from these cells. The m<sup>6</sup>A  
 30 level was quantified by m<sup>6</sup>A RNA Methylation Assay Kit. **(b) The effects of knockdown of**  
 31 **writer proteins on host mRNA.** Polyadenylated mRNA from panel A was isolated using poly-  
 32 A beads, and m<sup>6</sup>A level was quantified by m<sup>6</sup>A RNA Methylation Assay Kit. **(c) The effects of**  
 33 **overexpression of writer proteins on host RNA.** A549 cells were transfected with plasmids  
 34 encoding METTL3 and METTL14 or control vector. At 24 h post-transfection, total RNA was  
 35 extracted from these cells. The m<sup>6</sup>A level was quantified by m<sup>6</sup>A RNA Methylation Assay Kit.  
 36 **(d) The effects of overexpression of eraser proteins on host RNA.** A549 cells were transfected  
 37 with plasmids encoding FTO and ALKBH5 or control vector. At 24 h post-transfection, total  
 38 RNA was extracted from these cells. The m<sup>6</sup>A level was quantified by m<sup>6</sup>A RNA Methylation  
 39 Assay Kit. **(e) The effects of knockdown of writer proteins on host protein translation.** A549  
 40 cells were transfected with siRNA against METTL3 and METTL14 or control siRNA. After 24 h,  
 41 cells were incubated in methionine- and cysteine-free media for 1 h, and 50 μCi of [<sup>35</sup>S]-  
 42 methionine was added. At 0.5, 1, 2 h, cells were washed with PBS, lysed in lysis buffer, analyzed  
 43 by SDS-PAGE and exposed to film. **(f) Quantification of protein bands.** Quantification of  
 44 protein bands in panel E was done using ImageJ software. **(g) [<sup>35</sup>S] incorporation by**  
 45 **scintillation counting.** 5 μl of each sample from panel E was used for measuring [<sup>35</sup>S]  
 46 incorporation by scintillation counting. **(h) Percent of [<sup>35</sup>S] incorporation relative to control**  
 47 **siRNA.** Percentage was calculated from panel g. Results are the means of *n* = 3 **(a, c, and d)** or *n*  
 48 = 4 **(b)** biologically independent experiments ± standard deviation. The SDS-PAGE gel **(e)** is the  
 49 representative of *n* = 2 biologically independent experiments. Results in panels **f, g, and h** are  
 50 the means of *n* = 2 biologically independent experiments. Statistical significance was determined  
 51 by two-sided student's *t*-test. Exact *P* values are included in Data Source. \**P*<0.05; \*\**P*<0.01;  
 52 \*\*\**P*<0.001; and \*\*\*\**P*<0.0001.

53

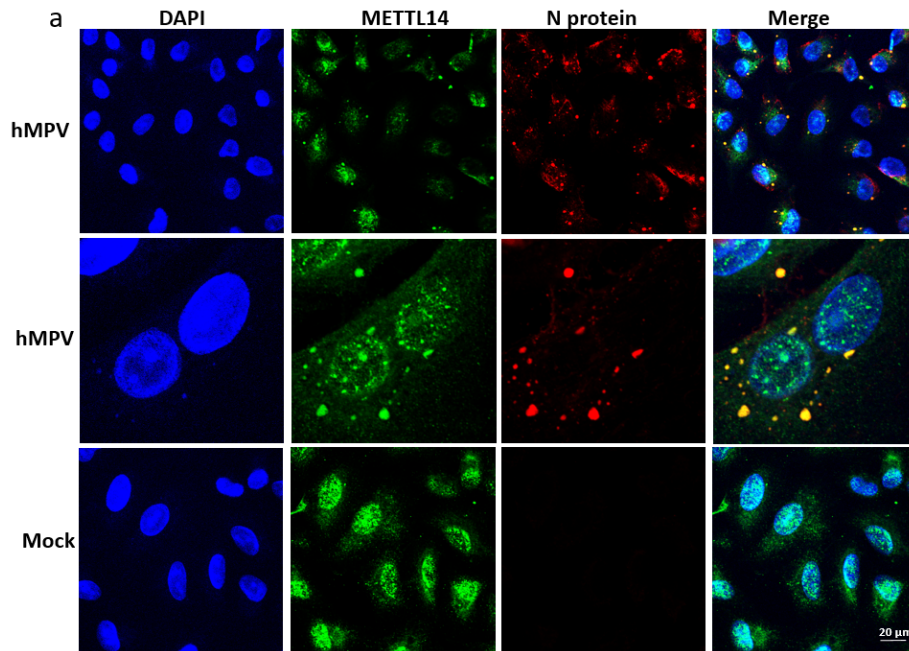

54

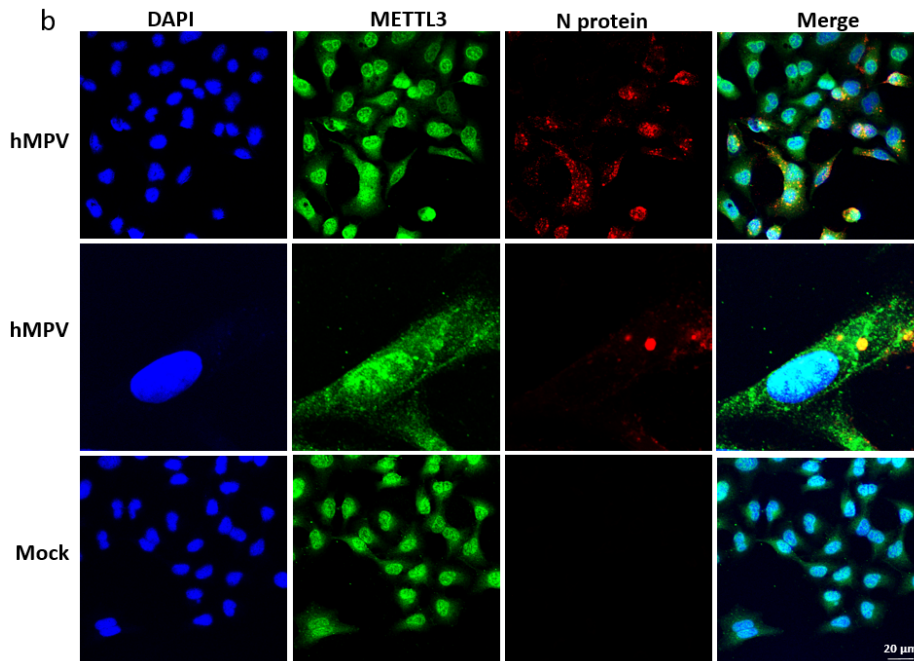

55

56 **Supplementary Fig.2. The effects of hMPV infection on distribution of m<sup>6</sup>A writer proteins**  
57 **in cells.** A549 cells were infected by rhMPV at an MOI of 5.0. At 24 h post-infection, mock- or  
58 rhMPV-infected cells were stained with writer protein antibody (green) and anti-hMPV N  
59 protein antibody (red), and were analyzed by confocal microscope. Nuclei were labeled with  
60 DAPI (blue). **(a)** METTL14; **(b)** METTL3. Representative results from  $n = 3$  biologically  
61 independent experiments are shown.

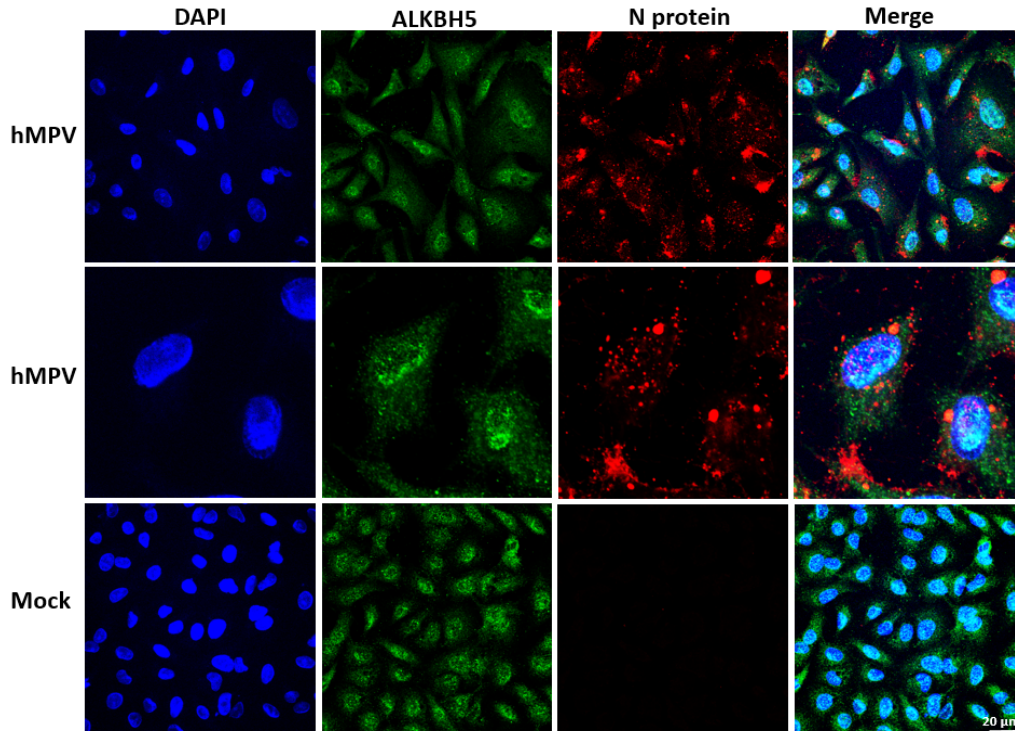

62

63 **Supplementary Fig.3. The effects of hMPV infection on distribution of m<sup>6</sup>A eraser proteins**  
 64 **in cells.** A549 cells were infected by rhMPV at an MOI of 5.0. At 24 h post-infection, mock- or  
 65 rhMPV-infected cells were stained with anti-ALKBH5 antibody (green) and anti-hMPV N  
 66 protein antibody (red), and were analyzed by confocal microscope. Nuclei were labeled with  
 67 DAPI (blue). Representative results from *n* = 3 biologically independent experiments are shown.

68

69

70

71

72

73

74

75



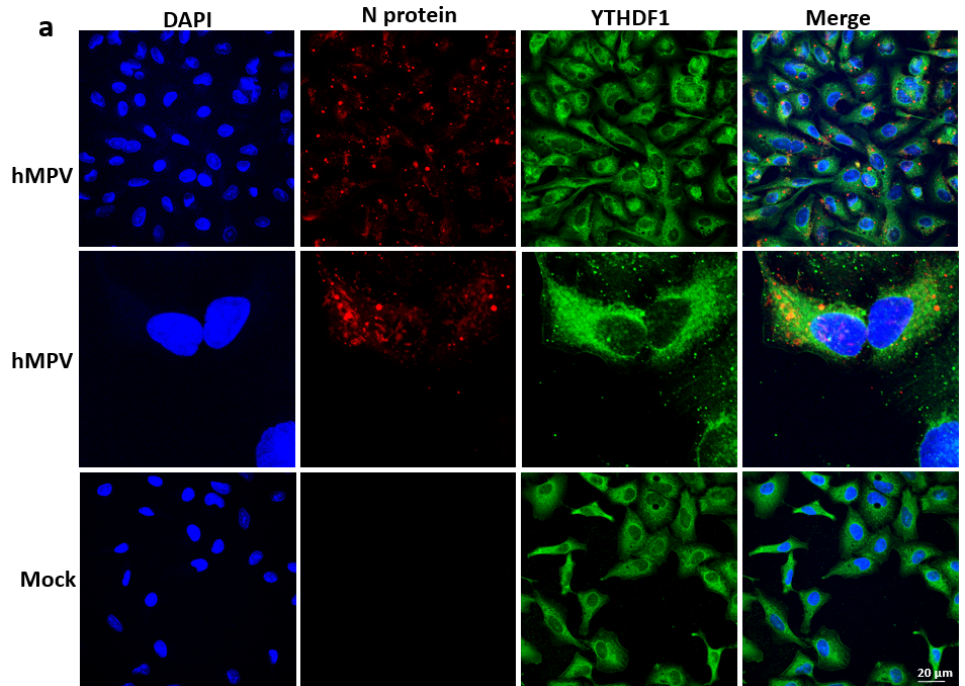

76

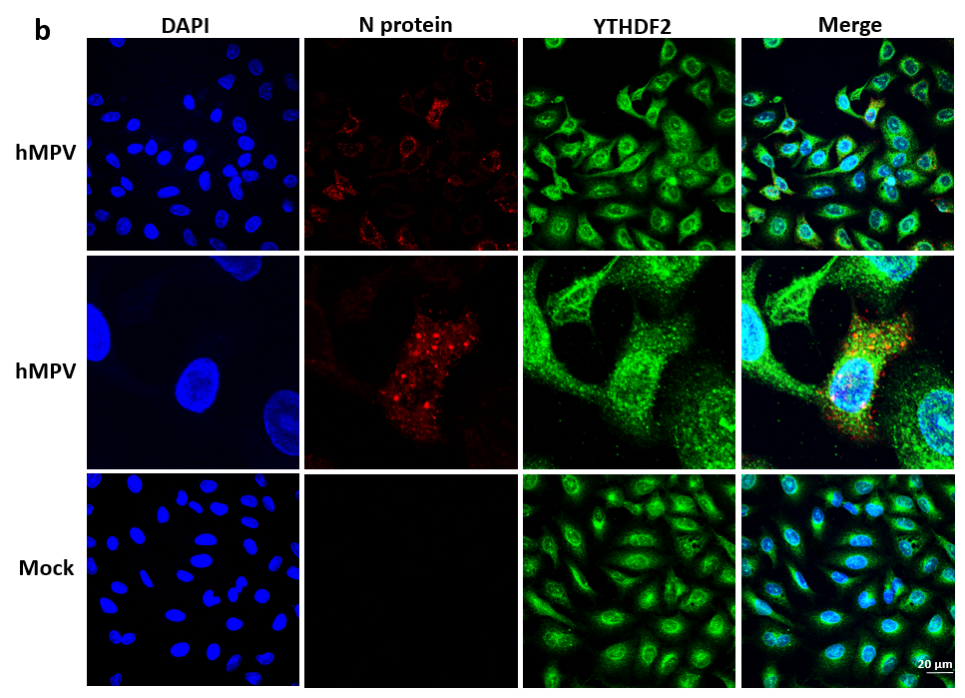

77

78

79

80

81

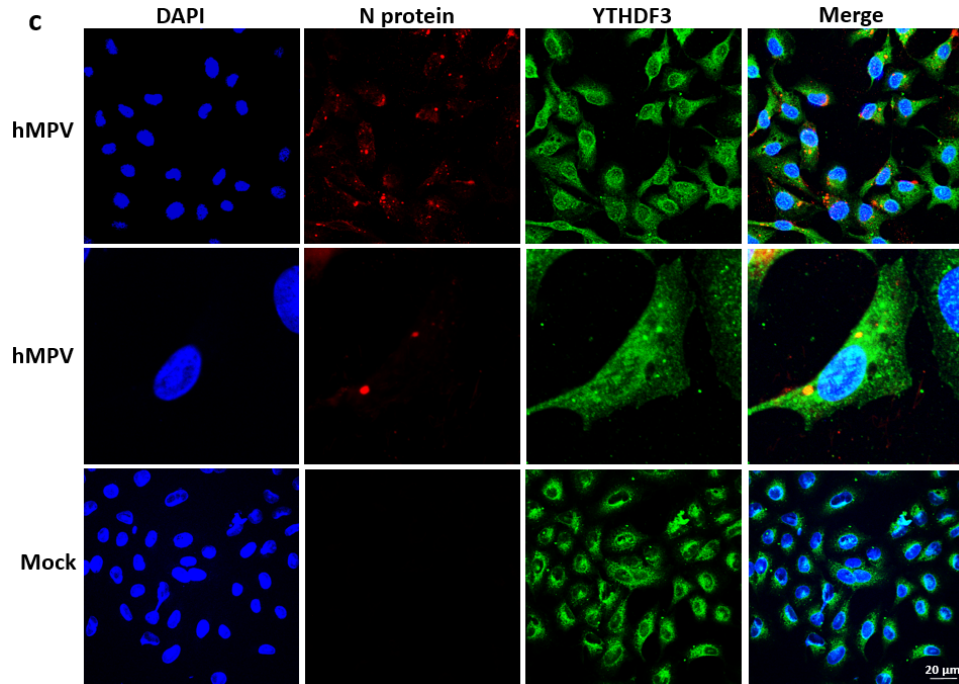

82

83 **Supplementary Fig.4. Distribution of m<sup>6</sup>A reader proteins in mock and hMPV-infected**  
 84 **A549 cells.** A549 cells were infected with rhMPV at an MOI of 5.0. At 24 h post-infection,  
 85 mock- or rhMPV-infected cells were stained with anti-reader antibody (green) and anti-hMPV N  
 86 protein antibody (red), and analyzed by confocal microscopy. Nuclei (blue) were labeled with  
 87 DAPI. **(a) YTHDF1; (b) YTHDF2; and (c) YTHDF3.** Representative results from  $n = 3$   
 88 biologically independent experiments are shown.

89

90

91

92

93

94

95

96

97

98

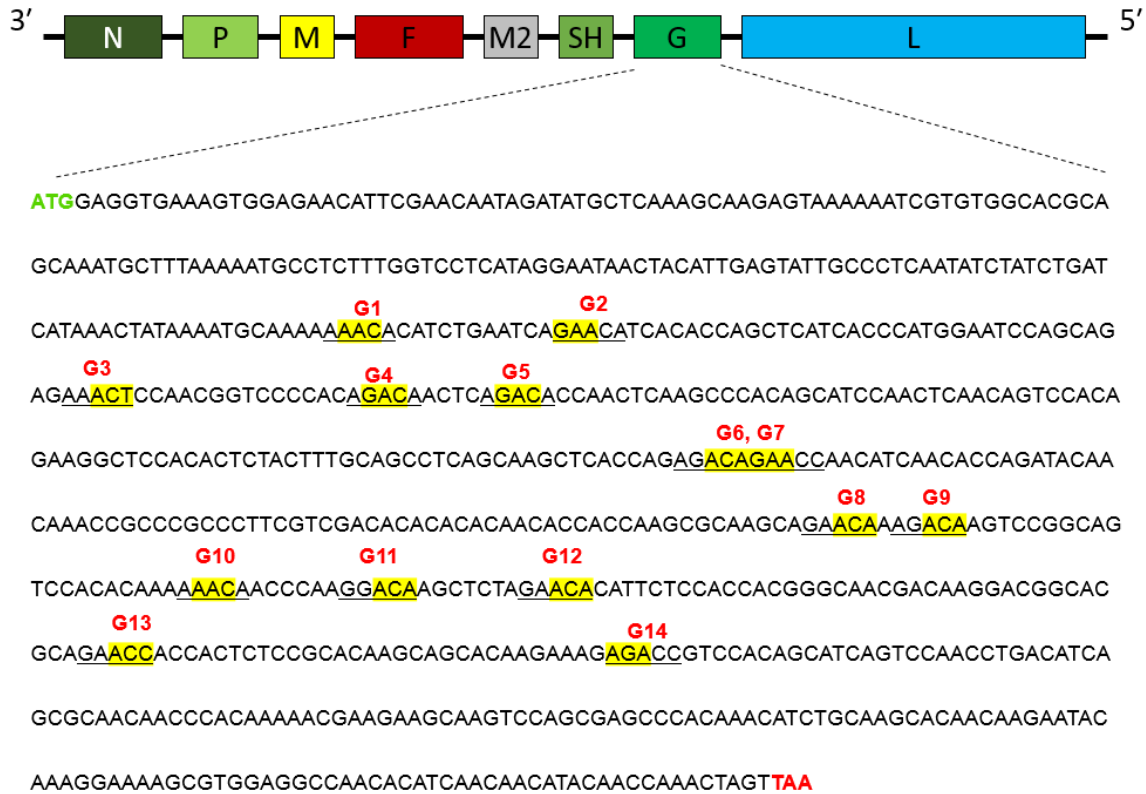

99

100 **Supplementary Fig.5. Mutagenesis strategy in putative m<sup>6</sup>A site in the G gene region in**  
 101 **hMPV antigenome and mRNA.** Schematic diagram of the hMPV genome with the mutations  
 102 for altering the critical A or C residues in the m<sup>6</sup>A motifs to produce rhMPV lacking that  
 103 putative m<sup>6</sup>A modification site in the G gene. A total of 14 putative m<sup>6</sup>A site, G1-G14, are  
 104 shown. G gene sequence of hMPV strain (subtype A strain NL/1/00, GenBank accession number  
 105 AF371337) is shown.

106

107

108

109

110

111

112

113

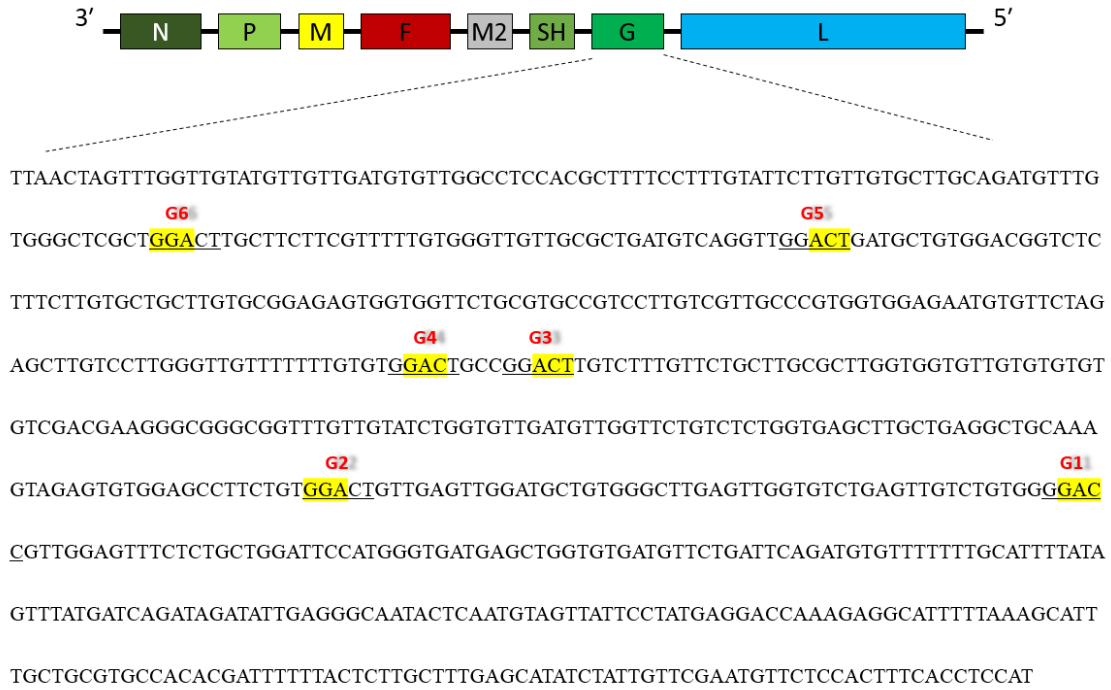

114

115 **Supplementary Fig.6. Mutagenesis strategy in putative m<sup>6</sup>A site in the G gene in hMPV**  
 116 **genome.** Schematic diagram of the hMPV genome with the mutations for altering the critical A  
 117 or C residues in the m<sup>6</sup>A motifs to produce rhMPV lacking that putative m<sup>6</sup>A modification site in  
 118 the G gene. A total of 6 putative m<sup>6</sup>A site, G1-G6, are shown.

119

120

121

122

123

124

125

126

127

128

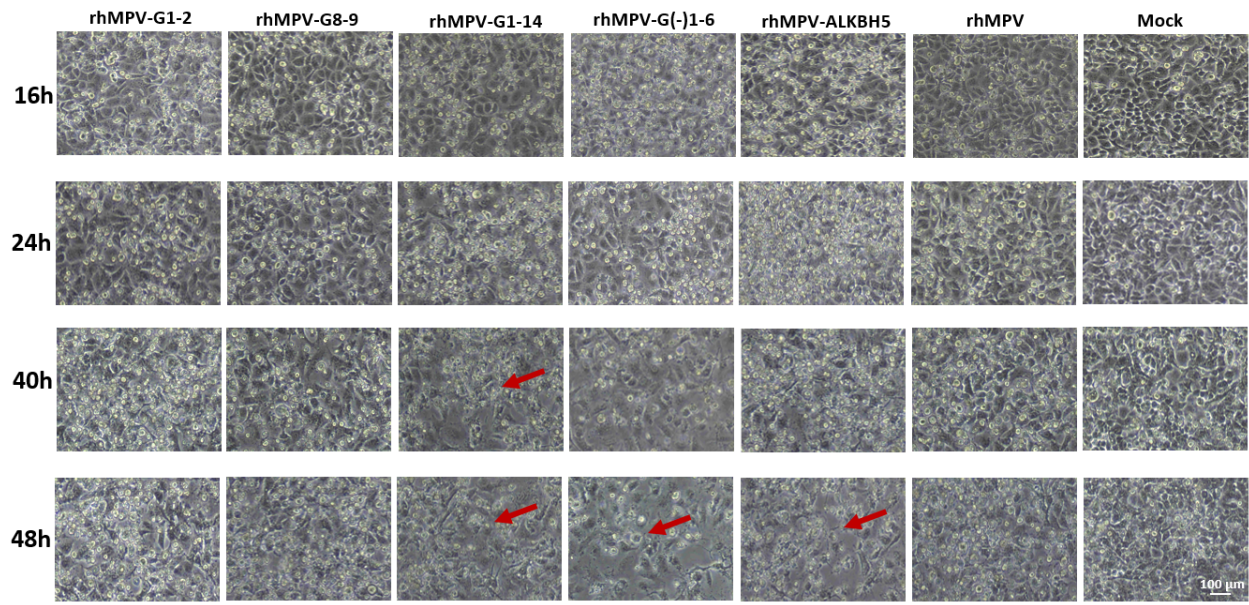

129

130

131 **Supplementary Fig.7. CPE produced by m<sup>6</sup>A-deficient hMPVs in A549 cells.** Confluent  
 132 A549 cells in 24-well plates were infected by each rhMPV mutant at an MOI of 5.0. CPE was  
 133 imaged at 16, 24, 40 and 48 h post-infection. Red arrow indicates CPE. Representative images  
 134 from *n* = 3 biologically independent experiments are shown.

135

136

137

138

139

140

141

142

143

144



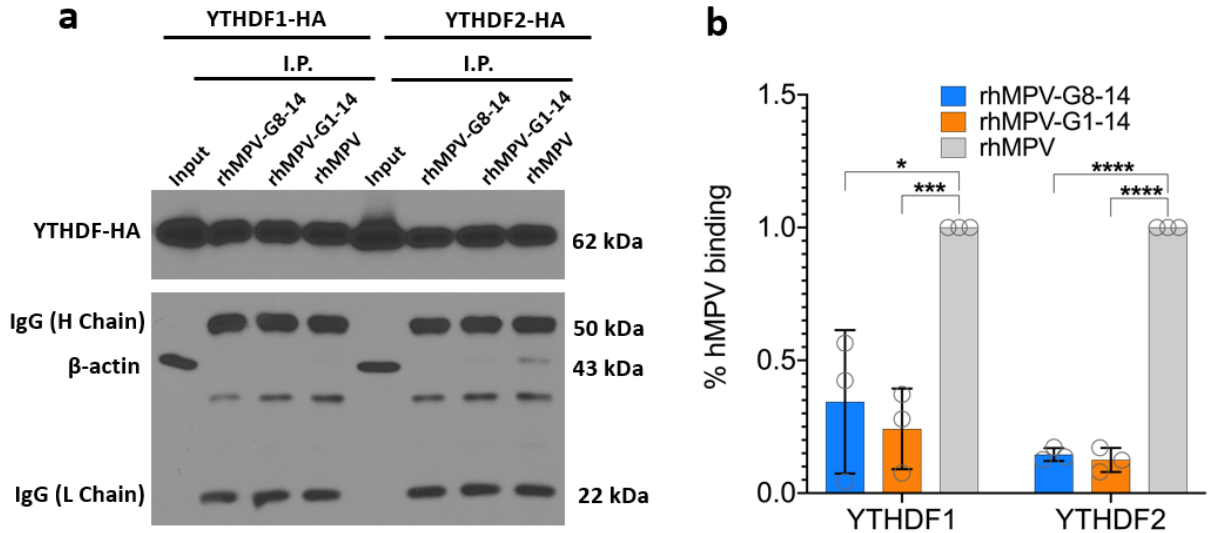

145

146

147 **Supplementary Fig.8. m<sup>6</sup>A-deficient rhMPV RNA has reduced binding efficiency to reader**

148 **proteins.** A549 cells in T25 flasks were transfected with plasmid pYTHDF1-HA or pYTHDF2-

149 HA, and were lysed in 650  $\mu$ L 1 $\times$  lysis buffer (abcam, ab152163) at 24 h post transfection. Cell

150 lysate was divided into 3 tube (200  $\mu$ L/tube) and incubated with 2 $\times$ 10<sup>8</sup> copies of virion RNA

151 (rhMPV-G8-14, rhMPV-G1-14, or rhMPV) and then incubated with 50 $\mu$ L Pierce anti-HA

152 Magnetic beads at room temperature for 30 min. Reader protein: RNA complex pulled down by

153 the beads was subjected to Western blot **(a)**. The amount of virion RNA captured by the

154 YTHDF1 or YTHDF2 was quantified by real-time RT-PCR. Percent of bound RNA of hMPV

155 mutants relative to rhMPV was calculated **(b)**. Input equals to 5 $\mu$ L of original lysate, and each

156 I.P. sample equals to 40 $\mu$ L of original lysate. Western blots **(a)** shown are the representatives of

157  $n = 3$  biologically independent experiments. Data shown **(b)** are averages of  $n = 3$  biologically

158 independent experiments  $\pm$  standard deviation. Statistical significance was determined by two-

159 sided student's *t*-test. *P* values of rhMPV-G8-14 or rhMPV-G1-14 compared to rhMPV are as

160 follows: YTHDF1, \**P*=0.01361, \*\*\**P*=0.00099; YTHDF2, \*\*\*\**P*=0.0000005, \*\*\*\**P*=0.0000005.

161

162

163

164

165

166

167

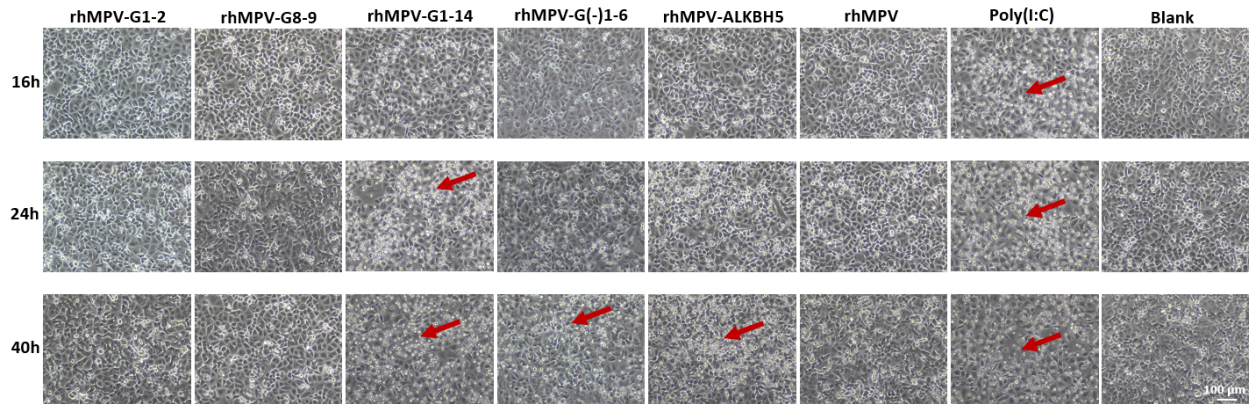

168

169

170 **Supplementary Fig.9. Cell-death triggered by virion RNA of m<sup>6</sup>A-deficient hMPVs.** Virion  
171 RNA was extracted from purified hMPV virions, the level of antigenome was quantified by real-  
172 time RT-PCR. A549 cells in 24-well plates were transfected with  $2 \times 10^7$  antigenome copies of  
173 virion RNA of each hMPV. Images were taken at 16, 24, and 40 post-transfection. Red arrow  
174 indicates CPE. Representative images from  $n = 3$  biologically independent experiments are  
175 shown.

176

177

178

179

180

181

182

183

184

185

186

187

188

189

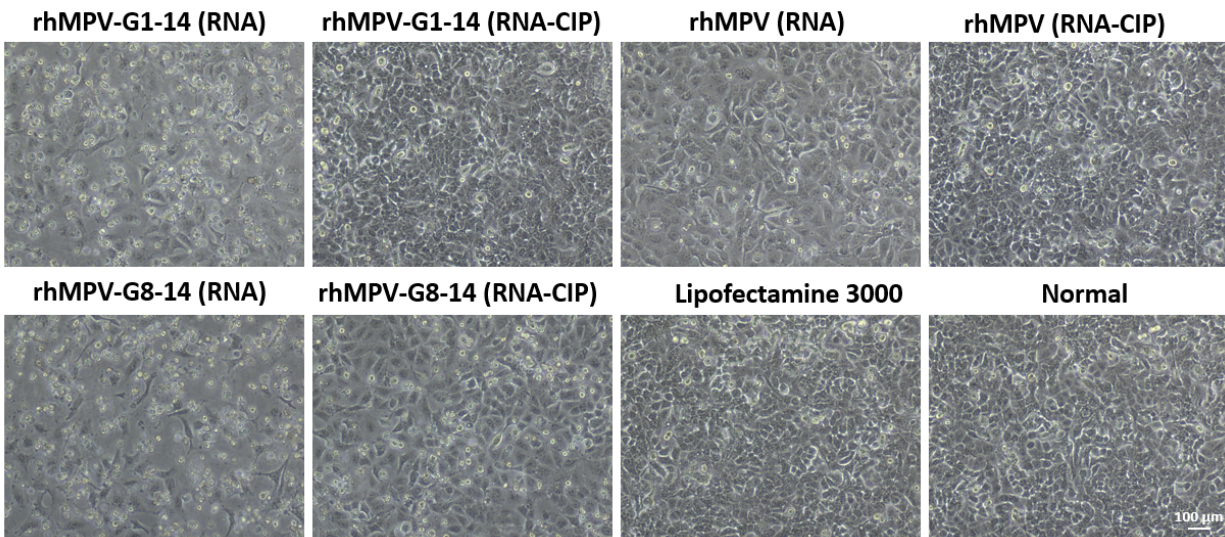

190

191 **Supplementary Fig.10. Cell-death triggered by virion RNA of m<sup>6</sup>A-deficient hMPVs with**  
192 **or without CIP.** Virion RNA was extracted from purified hMPV virions, the level of  
193 antigenome was quantified by real-time RT-PCR. A549 cells in 24-well plates were transfected  
194 with  $2 \times 10^7$  antigenome copies of virion RNA of each hMPV either with or without CIP  
195 treatment. Images were taken at 48 post-transfection. Representative images from  $n = 3$   
196 biologically independent experiments are shown.

197

198

199

200

201

202

203

204

205

206

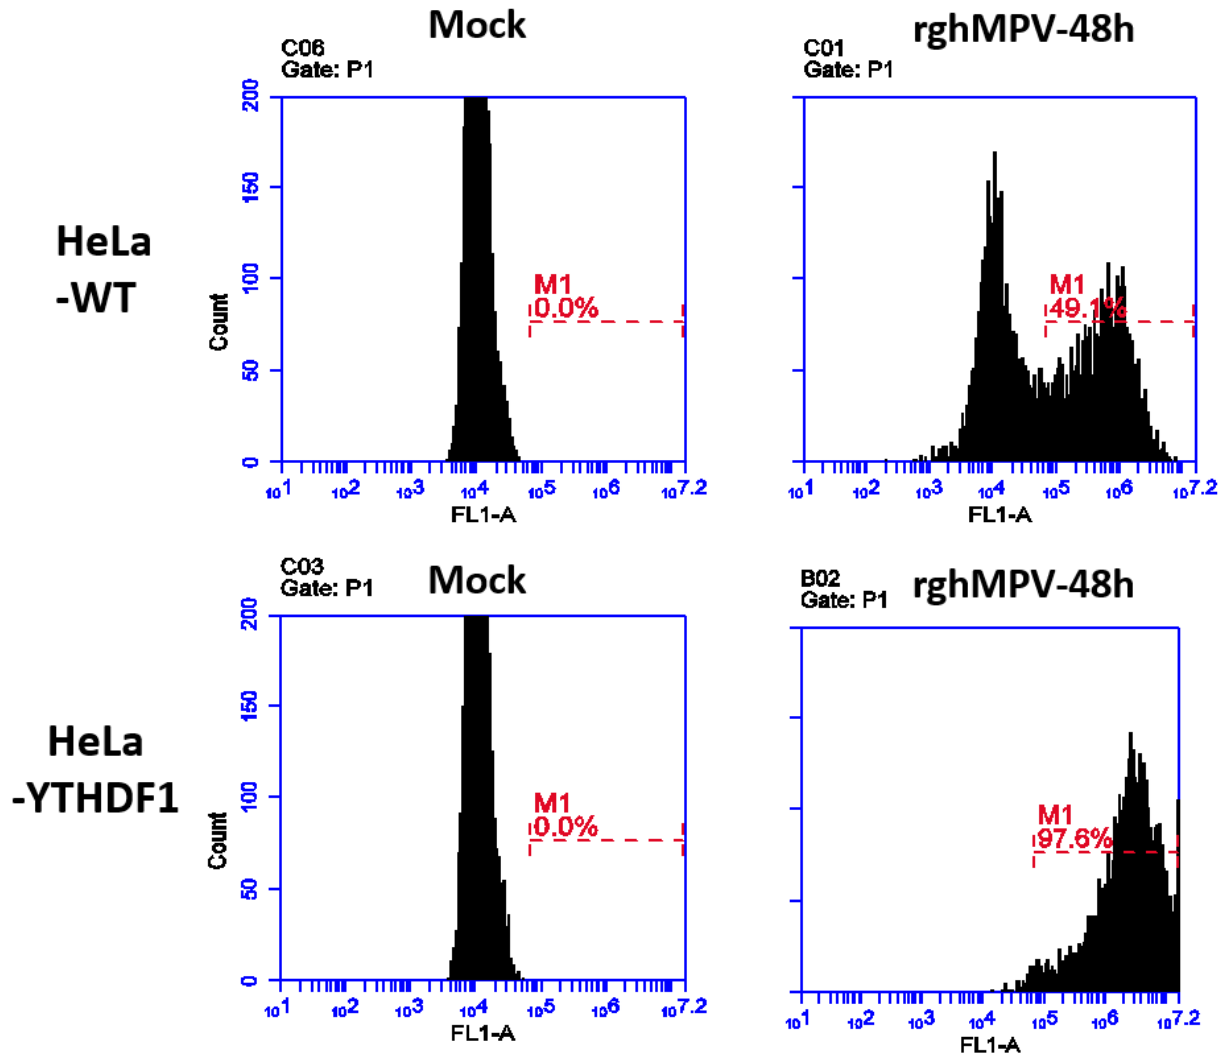

207

208 **Supplementary Fig.11. An example of gating strategy for flow cytometry.** WT HeLa cells or  
 209 HeLa cells stably overexpressing YTHDF1 were infected with rghMPV at an MOI of 1.0. At 48  
 210 h post-inoculation, cells were trypsinized and fixed in 4 % of paraformaldehyde and the number  
 211 of GFP-positive cells quantified by flow cytometry using Attune NxT Flow Cytometer. The  
 212 mock-infected cells (left panel) were used for gating controls. Then, the number of GFP-positive  
 213 and negative cells in rghMPV-infected cells were sorted (right panel). Attune NxT software was  
 214 used to collect and analyze the data. The results showed that 49.1% and 97.6% cells are GFP-  
 215 positive in rghMPV-infected HeLa-WT and HeLa-YTHDF1 cells respectively. The data shown  
 216 are the representatives from  $n = 3$  biologically independent experiments.

217

218

219

**Supplementary Table 1: List of m<sup>6</sup>A peaks in hMPV genome, antigenome, and mRNAs.**

| hMPV RNAs  | Peak no. | Peak range (nt) <sup>a</sup> | <i>P</i> value          | Gene location <sup>b</sup> | Peak size (nt) | Enrichment Fold <sup>c</sup> |
|------------|----------|------------------------------|-------------------------|----------------------------|----------------|------------------------------|
| Genome     | 1        | 1498-1617                    | $7.23 \times 10^{-10}$  | P                          | 119            | 1.59                         |
|            | 2        | 1887-1916                    | $2.23 \times 10^{-8}$   | P                          | 29             | 2.15                         |
|            | 3        | 2097-2126                    | $2.26 \times 10^{-4}$   | P                          | 29             | 2.33                         |
|            | 4        | 6499-6558                    | $4.53 \times 10^{-68}$  | G                          | 59             | 3.06                         |
|            | 5        | 6649-6947                    | $1.0 \times 10^{-128}$  | G                          | 298            | 2.79                         |
| Antigenome | 1        | 241-389                      | $4.47 \times 10^{-127}$ | N                          | 148            | 2.35                         |
|            | 2        | 420-449                      | $2.10 \times 10^{-2}$   | N                          | 29             | 1.16                         |
|            | 3        | 1468-1587                    | $1.0 \times 10^{-128}$  | P                          | 119            | 3.12                         |
|            | 4        | 1768-1916                    | $1.0 \times 10^{-128}$  | P                          | 148            | 2.96                         |
|            | 5        | 2816-2935                    | $4.47 \times 10^{-65}$  | M                          | 119            | 1.86                         |
|            | 6        | 3265-3294                    | $9.62 \times 10^{-13}$  | F                          | 29             | 2.05                         |
|            | 7        | 3325-3414                    | $2.58 \times 10^{-75}$  | F                          | 89             | 2.42                         |
|            | 8        | 3534-3623                    | $2.84 \times 10^{-7}$   | F                          | 89             | 1.36                         |
|            | 9        | 3954-4042                    | $4.65 \times 10^{-12}$  | F                          | 88             | 1.53                         |
|            | 10       | 4373-4492                    | $1.99 \times 10^{-33}$  | F                          | 119            | 1.96                         |
|            | 11       | 6404-6902                    | $1.0 \times 10^{-128}$  | G                          | 498            | 3.12                         |
|            | 12       | 10691-10780                  | $6.19 \times 10^{-22}$  | L                          | 89             | 2.08                         |
| mRNA       | 1        | 1513-1572                    | $1.0 \times 10^{-128}$  | P                          | 59             | 1.78                         |
|            | 2        | 6459-6577                    | $1.0 \times 10^{-128}$  | G                          | 118            | 12.31                        |
|            | 3        | 6637-6844                    | $1.16 \times 10^{-5}$   | G                          | 207            | 14.808                       |
|            | 4        | 10735-10764                  | $1.0 \times 10^{-128}$  | L                          | 29             | 1.22                         |

a. Nucleotide sequence is referred to subtype A strain NL/1/00 (GenBank accession number AF371337). Nucleotide ranges are indicated. These regions contain putative m<sup>6</sup>A sites. b. The hMPV genes are covered by m<sup>6</sup>A peaks. c. Log enrichment of the m<sup>6</sup>A peaks identified in hMPV antigenome, genome, and mRNA. Two replicates ( $n = 2$ ) of RNA samples from virions, virus-infected cells, and mock-infected cells were subjected to m<sup>6</sup>A-seq. For data analysis, after removing the adapter sequences, the reads were mapped to the human genome (hg38) and hMPV genome using Hisat2. Peak calling for the viral genome RNA was done by first dividing the hMPV genome into 30bp consecutive bins where read counts were quantified. Then we applied Fisher's exact test to assess the enrichment of coverage by m<sup>6</sup>A-IP in these bins. The odds ratios were computed by (IP/overall IP)/(Input/overall Input) where overall IP/Input were represented by the median of read counts of bins across the same strand of the whole virus genome. Note, when calling peaks for mRNAs of the hMPV, the overall IP/Input were represented by the median of bins across the gene instead of the whole virus genome. Finally, we merged all neighboring bins that were significant (at FDR < 0.05 cutoff) in all replicates and reported them as consistent peaks. Statistical analysis was determined by Fisher's exact test. The *P* value for each peak is indicated.



249 **Supplementary Table 2. Differentially m<sup>6</sup>A methylated peaks in A549 cells after hMPV**  
250 **infection.** The m<sup>6</sup>A-methylome of the mock infected and hMPV infected cells was compared.  
251 Fisher's exact tests were used for peak calling. QNB package was used for differential  
252 methylation test with default setting. Two replicates ( $n = 2$ ) of RNA samples from virus-infected  
253 cells and mock-infected cells was used for analysis. A total of 21 differentially m<sup>6</sup>A methylated  
254 peaks are identified using count based QNB test.

255  
256 **Supplementary Table 3. Differentially expressed genes in A549 cells after hMPV infection.**  
257 The input of m<sup>6</sup>A-seq is equivalent to regular RNA-seq, therefore we quantified the gene-level  
258 read counts of input samples that aligned to hg38 for differential gene expression analysis. Wald  
259 test implemented in DESeq2 was used to make inferential tests where differentially expressed  
260 genes were identified at FDR < 0.1 cutoff. Two replicates ( $n = 2$ ) of RNA samples from virus-  
261 infected cells and mock-infected cells was used for analysis. Over three thousand differentially  
262 expressed genes are identified by analysis of RNA-seq data of host cell (A549) at adjusted  $P$   
263 value cutoff of 0.1.

264  
265 **Supplementary Table 4. List of upregulated genes involved in antiviral immune response**  
266 **after hMPV infection.** Differentially expressed genes are identified using count based QNB test.  
267 Wald test implemented in DESeq2 were used. Two replicates ( $n = 2$ ) of RNA samples from  
268 virus-infected cells and mock-infected cells were used for analysis. Numerous interferon  
269 encoded genes are upregulated including interferon lambda receptor 1, interferon beta 1,  
270 interferon lambda 2, interferon lambda 4, and genes involved in Pattern Recognition Receptor  
271 (PRR) including RIG-I, MDA5, LPG2, and multiple interferon-stimulated genes (ISGs).

272

**Supplementary Table 5. List of siRNAs used for experiments.**

| <b>siRNA</b>  | <b>Sequences (5'-3')</b>     |
|---------------|------------------------------|
| YTHDF1        | 5'-CCGCGTCTAGTTGTTTCATGAA-3' |
| YTHDF2        | 5'-AAGGACGTTCCCAATAGCCAA-3'  |
| YTHDF3        | 5'-ATGGATTAAATCAGTATCTAA-3'  |
| METTL3        | 5'-CTGCAAGTATGTTCACTATGA-3'  |
| METTL14       | 5'-AAGGATGAGTTAATAGCTAAA-3'  |
| ALKBH5        | 5'-AAACAAGTACTTCTTCGGCGA-3'  |
| FTO           | 5'-AAATAGCCGCTGCTTGTGAGA-3'  |
| Control siRNA | 5' ACGTGACACGTTCCGGAGAA-3'   |

273

274

275

276

277

278

279

280

281

282

## Supplementary Discussion

283  
284  
285  
286  
287  
288  
289  
290  
291  
292  
293  
294  
295  
296

Our RNA-seq found that highly purified hMPV virions contain both the genome and the antigenome. To confirm this, purified hMPV virions were disrupted by detergent, digested with RNase, and the RNase-resistant viral nucleocapsid (N-RNA complex) was pulled down by hMPV N antibody. Real-time RT-PCR analysis of nucleocapsid showed that the N-encapsidated genome and antigenome are indeed packaged into hMPV virions. Similarly, we recently showed that antigenome was packaged into virions of human respiratory syncytial virus (RSV) <sup>1</sup>, another penumovirus. Also, studies in early 1970s found that antigenomes of several paramyxoviruses (such as Sendai virus and Newcastle disease virus) were packaged into mature virions <sup>2, 3</sup>. Interestingly, the amount of antigenome in mature virions is dependent on different virus strains and host cell lines <sup>2</sup>. In addition, the antigenomes of Sendai virus were shown to bud into virus particles as efficiently as the genomes <sup>3</sup>.

297 Our main conclusion is that *N*<sup>6</sup>-methyladenosine is a molecular signature for  
298 discriminating self from non-self RNA by RNA sensor RIG-I. A model consistent with our  
299 findings is depicted in **Fig.4i**. Upon virus entry, the ribonucleoprotein (RNP) complex, composed  
300 of the genome wrapped in the nucleocapsid (N) protein, associated with the viral RNA-  
301 dependent RNA polymerase (RdRP), is delivered into the cytoplasm where viral transcription  
302 and replication occur. During transcription, the RdRP sequentially transcribes the 8 viral genes  
303 into 9 mRNAs which are m<sup>6</sup>A methylated and translated into 9 proteins, including the N protein.  
304 During replication, the RdRP initiates at the extreme 3' end of the genome and synthesizes a full-  
305 length complementary antigenome, which is methylated by m<sup>6</sup>A writer proteins and

306 subsequently encapsidated by soluble N protein in a helical nucleocapsid with 9 to 10  
307 bases/rotation of the helix <sup>4</sup>. This N-antigenomic RNA serves as template for synthesis of full-  
308 length progeny genomes, which are also m<sup>6</sup>A methylated and encapsidated by soluble N protein.  
309 RNA m<sup>6</sup>A methylation likely occurs prior to or concomitant with encapsidation, supported by  
310 the observation that N is partially co-localizes with METTL3 and strongly co-localizes with  
311 METTL14 in inclusion bodies where new RNP is assembled and active viral replication occurs.  
312 The antigenome and genome are 5' triphosphorylated. Those that are not m<sup>6</sup>A methylated are  
313 recognized as a “nonself RNA” by RIG-I. The deficiency of m<sup>6</sup>A in virion RNA induces higher  
314 RIG-I expression, an enhanced RIG-I binding affinity and an enhanced ability to trigger the  
315 conformational change in RIG-I that corresponds to enhanced signaling to the downstream  
316 adaptor protein MAVS, activating IRF3 and NF-κB pathways, leading to higher production of  
317 type-I IFN and proinflammatory cytokines. In contrast, although the wild type hMPV virion  
318 RNA can be recognized by RIG-I due to the 5'ppp, the internal m<sup>6</sup>A modification appears to  
319 interfere with the high affinity binding of the RNA with the RIG-I helicase domain. Without this  
320 separate RNA interaction, the low binding affinity association with 5'ppp does not appear to  
321 efficiently induce the RIG-I mediated IFN signaling pathway. In addition, RIG-I is a 5'-  
322 triphosphate-dependent translocase, traveling from the 5'-ppp into the RNA chain to trigger  
323 oligomerization <sup>5, 6</sup>. Recently, it was found that the translocation of RIG-I and the following  
324 RIG-I oligomerization is hindered by internal 2'-O methylation in dsRNA <sup>7</sup>. Thus, it is likely that  
325 m<sup>6</sup>A methylation may also serve as a “brake” or “throttle” to prevent RIG-I translocation and  
326 oligomerization, leading to downstream signaling

327 .

328           One aspect of this scenario would seem to be unlikely, that the m<sup>6</sup>A-modified genome or  
329 antigenome, tightly encapsidated by the N protein, would be accessible to RIG-I. And even if  
330 RIG-I could bind to the terminal 5'ppp, how would it be able to reach further into the RNA to  
331 find a non-methylated m<sup>6</sup>A site? A more likely scenario might be that all of the genomes and  
332 antigenomes that are synthesized are not encapsidated. Particularly early in the infectious cycle,  
333 when the concentration of the N protein is low, some of these full-length RNA genomes and  
334 antigenomes may not be encapsidated, enabling RIG-I access to both the 5'ppp and RNA  
335 downstream from it. Unencapsidated full-length genome or antigenome RNAs would likely be  
336 fragile, as they are susceptible to cytoplasmic RNases. However, only a 5' fragment would be  
337 necessary to activate RIG-I in this scenario.

338

339           Our m<sup>6</sup>A-seq analysis showed that all three species of viral RNA are m<sup>6</sup>A methylated and  
340 the strongest m<sup>6</sup>A peaks are located in the G gene mRNA and the region corresponding to the G  
341 gene in both genome and antigenome, leading us to mutate these m<sup>6</sup>A sites. We modified the  
342 positive-strand RNA, disrupting m<sup>6</sup>A sites of both the G mRNA (transcription product) and  
343 antigenome (replication intermediate). We also mutated the m<sup>6</sup>A sites in the G gene in negative-  
344 sense genome RNA. By overexpressing m<sup>6</sup>A eraser protein, we generated hMPV that is naturally  
345 defective in m<sup>6</sup>A methylation in its antigenome and genome. In all cases, these m<sup>6</sup>A-deficient  
346 rhMPVs and their virion RNAs induced significantly higher type I IFN responses. Both genome  
347 and antigenome ssRNAs contain 5' triphosphate, a known ligand for RIG-I<sup>8,9</sup>. Removal of the 5'  
348 triphosphate abrogated the RIG-I expression, RIG-I binding, IRF3 phosphorylation, and IFN  
349 response of both wild type antigenome and m<sup>6</sup>A-deficient antigenome, suggesting that 5'  
350 triphosphate is absolutely required for RIG-I signaling. However, when m<sup>6</sup>A sites in the



351 antigenome and genome were mutated or naturally removed by eraser proteins, the expression of  
352 RIG-I and the binding affinity of RIG-I for the m<sup>6</sup>A-deficient virion RNA was significantly  
353 enhanced compared to the wild type virion RNA, leading to a higher type I IFN response. Thus,  
354 marking antigenome and genome RNA with m<sup>6</sup>A methylation allows it to escape detection by  
355 RIG-I. The m<sup>6</sup>A sites in both genome and antigenome are involved in innate immune recognition.  
356

357         The crystal structures of the ligand-free, autorepressed, and RNA-bound, activated states  
358 of RIG-I has been resolved <sup>10, 11, 12</sup>. These structure studies provided a detailed view of how RIG-  
359 I recognizes the 5' end of double strand RNA (dsRNA) or single strand RNA (ssRNA) and how  
360 RIG-I conformational change occurs upon binding to these short RNA ligands. Based on these  
361 structure studies, a limited trypsin digestion assay is developed and often used for discriminating  
362 the autorepressed and the activated states of RIG-I <sup>10, 13, 14</sup>. It should be noted that these structural  
363 and biochemical studies used in vitro synthesized, short ssRNA or dsRNA as the RNA ligand. In  
364 this study, we compared the trypsin sensitivity of RIG-I upon binding of full-length hMPV  
365 genome and antigenome RNA (13,350 bp), virion RNA of rhMPV-G1-14 and G8-14 yielded  
366 significantly more trypsin-resistant 80-kDa fragment than RNA of rhMPV-G1-2, G8-9, and  
367 rhMPV. These results demonstrated that m<sup>6</sup>A-deficient virion RNA facilitates RIG-I  
368 conformational changes and forms RIG-I: RNA complex which is more resistant to trypsin  
369 digestion. However, it is unclear whether this assay really represent how native viral RNA  
370 interacts with RIG-I. A future direction is to determine the structure of RIG-I with m<sup>6</sup>A  
371 sufficient or m<sup>6</sup>A-deficient antigenome and genome RNA.

372

373           It is unlikely that the defective interfering (DI) particles contribute to the higher  
374 activation of RIG-I in our experiments. We used a relatively low MOI (0.5) for preparation of  
375 virus stock. All virus stocks were purified through a sucrose gradient ultracentrifugation, which  
376 allows for separation of infectious virus particles and DI particles. Solution layer containing  
377 virus was extracted with syringe to avoid any possible contamination of DI particles. Our RNA  
378 transfection experiment showed that the degrees of defects in virion RNA m<sup>6</sup>A methylation were  
379 nicely correlated with the levels of type I IFN responses and the levels of signaling molecules  
380 involved in the RIG-I mediated IFN pathway. Our finding was further supported by the rhMPV-  
381 ALKBH5, a recombinant hMPV that is naturally defective in m<sup>6</sup>A methylation in genome and  
382 antigenome.

383

384           Unlike genome and antigenome, hMPV mRNAs are capped and G-N-7 and ribose 2'-O  
385 are methylated at the 5' end and the mRNA is polyadenylated at the 3' end. Neither modification  
386 is recognized by RIG-I or MDA5. Previously, it was shown that viral mRNA lacking 2'-O  
387 methylation can be detected by MDA5 and the IFIT family, highlighting that 2'-O methylation  
388 also serves as a molecular marker for host innate immunity to discriminate self from nonself  
389 mRNA. Here we found that m<sup>6</sup>A deficient G mRNA with G-N-7 and ribose 2'-O methylation is  
390 not recognized by RIG-I or MDA5, suggesting that m<sup>6</sup>A methylation in mRNA does not play a  
391 role in innate immunity. However, our data suggest that m<sup>6</sup>A methylation of viral mRNA plays  
392 an important role in enhancing mRNA translation. First, overexpression of m<sup>6</sup>A reader and  
393 writer proteins enhanced G protein expression whereas knockdown of these proteins inhibited G  
394 expression. Second, G protein expression was inhibited when m<sup>6</sup>A sites in G mRNA were  
395 mutated. The impact of m<sup>6</sup>A methylation on mRNA stability and protein synthesis is relatively

396 well understood. For example, METTL3 knockdown caused nearly 30% decrease of global  
397 protein synthesis<sup>15</sup>. All three m<sup>6</sup>A reader proteins can promote translation of host and viral  
398 protein translation. In addition, YTHDF2 can regulate decay of both host and viral mRNAs<sup>16,17</sup>.  
399 YTHDF2 can bind to m<sup>6</sup>A-methylated transcripts leading to its re-localization from the pool of  
400 ribosome-associated translatable transcripts to the P-bodies where RNA decay occurs<sup>16</sup>.

401

402 Notably, we found that m<sup>6</sup>A-deficient hMPVs triggered significantly higher type I  
403 interferon responses compared to the parental hMPV, thereby contributing to the restriction of  
404 viral replication. In addition, both m<sup>6</sup>A-deficient rhMPV and isolated antigenome and/or  
405 genome RNA induced higher expression of RIG-I. However, IFN response was completely  
406 abrogated when RIG-I or MAVs but not MDA5 were knocked out from A549 cells. The binding  
407 affinity of RIG-I to m<sup>6</sup>A-deficient RNAs significantly increased compared to the m<sup>6</sup>A-sufficient  
408 RNAs. This suggests that RIG-I played a dominant role in recognizing m<sup>6</sup>A-deficient rhMPV  
409 and antigenome. This conclusion was further supported by the fact that the replication of m<sup>6</sup>A-  
410 deficient hMPVs was completely or partially restored in A549 cells when RIG-I or MAVs but  
411 not MDA5 were knocked out. In addition, we found that m<sup>6</sup>A-deficient rhMPV and antigenome  
412 triggered a higher NF-κB driven SEAP activity. These results suggest that m<sup>6</sup>A-deficient RNA  
413 contributes to the enhanced activation of transcription factors belonging to the NF-κB and IRF  
414 families which lead to the enhanced expression of IFN. On the other hand, recent evidence  
415 suggests that m<sup>6</sup>A writer and eraser proteins are involved in regulation of innate immune  
416 responses by affecting export, stability, and translation of antiviral genes<sup>18,19</sup>. For example,  
417 upon VSV infection, DEAD-box helicase (DDX46) was shown to recruit m<sup>6</sup>A eraser protein  
418 ALKBH5 to demethylate m<sup>6</sup>A-modified antiviral transcripts, resulting in retention of these

419 transcripts in the nucleus, prevention of their translation, and inhibition of interferon production  
420 and antiviral responses <sup>19</sup>. Depleting METTL14 increased both nascent IFNB1 mRNA  
421 production and stability in response to dsDNA or human cytomegalovirus (HCMV) infection <sup>18</sup>.  
422 In contrast, ALKBH5 depletion had the opposite effect <sup>18</sup>. In a separate study, it was shown that  
423 IFNB mRNA is m<sup>6</sup>A modified and is more stable in METTL3- and YTHDF2-depleted cells,  
424 leading to an increase in IFN production following HCMV infection <sup>20</sup>.

425  
426 Overall, the degrees of the defects in RNA m<sup>6</sup>A methylation are highly correlated with the  
427 levels of type I IFN responses and the levels of signaling molecules involved in the RIG-I  
428 mediated pathway. Antigenome of rhMPV-G1-14 contains more m<sup>6</sup>A site mutations than the  
429 antigenome of rhMPV-G1-2 and G8-9. Consistent with higher defects in m<sup>6</sup>A methylation, the  
430 antigenome of rhMPV-G1-14 induced significantly higher RIG-I expression, more RIG-I  
431 conformational changes, and more IFN production than the antigenome of rhMPV-G1-2 and G8-  
432 9 when their virion RNAs were transfected into A549 cells. Interestingly, in virus-infected cells,  
433 rhMPV-G1-2 and G8-9 induced more IFN than rhMPV-G1-14 under some conditions (e.g. MOI  
434 of 4.0 in A549 cells). We interpret this discrepancy as being due to the complicated nature of  
435 IFN regulation during hMPV infection, involving viral RNA replication, protein synthesis, and  
436 alteration of host gene expression. In contrast, virion RNA transfection avoids these  
437 complicating factors, examining more directly the effects of m<sup>6</sup>A methylation of RNA on IFN  
438 production. Importantly, in addition to the RIG-I pathway, several other signaling pathways  
439 including MDA5 and TLR3/TLR4/TLR7 are triggered during hMPV infection <sup>21, 22</sup> and may play  
440 a role. Also, several viral proteins (G, M2-2, SH, and P) have been shown to inhibit these  
441 pathways <sup>21, 22</sup>. For example, it was shown that hMPV G protein inhibits innate immunity by  
442 inhibiting RIG-I activation and impairing the TLR4-dependent signaling pathway <sup>23, 24</sup>, based on

443 the observation that rhMPV lacking its G protein (rhMPV-ΔG) induced significantly higher  
444 production of type I IFN and chemokines than wild type hMPV in A549 cells<sup>23</sup>. In fact, rhMPV-  
445 ΔG was highly attenuated in viral replication in cell culture as well as in the upper and lower  
446 respiratory tract of Syrian hamsters and African green monkeys<sup>25</sup>. Since the G gene region has  
447 the strongest m<sup>6</sup>A peaks in the hMPV genome, deletion of the G gene from the genome would  
448 result in a natural m<sup>6</sup>A-deficient virus. Thus, it is possible that m<sup>6</sup>A-deficient genome and  
449 antigenome produced by rhMPV-ΔG activated the RIG-I signaling pathway, rather than the loss  
450 of G protein expression suppressing RIG-I. Purified virion RNA from m<sup>6</sup>A deficient rhMPVs,  
451 which did not contain any viral proteins, directly triggered higher RIG-I expression and a more  
452 robust IFN response. In addition, compensation for the reduced G protein expression did not  
453 inhibit the IFN response of these m<sup>6</sup>A-deficient rhMPVs.

454

455         Viral RNA m<sup>6</sup>A methylation and its functions is an emerging field that has only been  
456 explored over the past two years. Detailed mechanisms by which m<sup>6</sup>A controls virus replication  
457 and gene expression are still poorly understood. We demonstrated that the multiple biological  
458 functions of m<sup>6</sup>A methylation collectively contribute to enhanced hMPV replication and gene  
459 expression. First, during replication, the newly synthesized genome and replicative intermediate  
460 (antigenome) are m<sup>6</sup>A methylated by m<sup>6</sup>A writer proteins to prevent their detection by the innate  
461 immune system. Second, during transcription, viral mRNAs are also m<sup>6</sup>A methylated which  
462 enhances their translation which in turn may enhance virus spread. However, viral m<sup>6</sup>A appears  
463 to play an antiviral role in several flaviviruses such as HCV and Zika virus via an unknown  
464 mechanism(s)<sup>26,27</sup>. Resolving why m<sup>6</sup>A has a pro-viral function in some viruses whereas it has  
465 an antiviral function in other viruses may facilitate a strategy to develop m<sup>6</sup>A as an antiviral drug

466 target.

467

468 One important application of this work is in the development of live attenuated vaccine  
469 candidates for hMPV by reducing m<sup>6</sup>A methylation in viral RNAs. Currently, hMPV is the  
470 second leading causative agent of acute respiratory disease in infants, children, and the elderly<sup>28</sup>.  
471<sup>29</sup>, behind RSV. Despite major efforts, there is no FDA-approved vaccine for hMPV<sup>29</sup>.  
472 Inactivated vaccines are not suitable for hMPV because they cause enhanced lung damage upon  
473 re-infection with the same virus<sup>30</sup>. In contrast, enhanced lung damage has not been observed for  
474 live attenuated vaccine candidates<sup>31, 32</sup>. Thus, a live attenuated vaccine is one of the most  
475 promising candidates for hMPV<sup>33</sup>. However, it has been a challenge to identify a live attenuated  
476 vaccine strain that has an optimal balance between attenuation and immunogenicity. Since viral  
477 m<sup>6</sup>A acts in a pro-viral manner for hMPV, it should be feasible to generate an m<sup>6</sup>A-deficient  
478 rhMPV strain that is sufficiently attenuated yet retains high immunogenicity. In this study, we  
479 showed that depletion of m<sup>6</sup>A sites in G mRNA resulted in a recombinant virus (rhMPV-G1-14)  
480 that is sufficiently attenuated in replication in the lungs but only had a mild defect in replication  
481 in nasal turbinate. Cotton rats immunized with this m<sup>6</sup>A-deficient hMPV expressed a high level  
482 of neutralizing antibody and were completely protected against challenge with parental rhMPV,  
483 highlighting the potential of utilizing an m<sup>6</sup>A-deficient hMPV mutant as a live vaccine candidate.  
484 This phenotype is similar to that of the cold-adapted attenuated viruses, which replicate in upper  
485 but not lower respiratory tracts. Cold-adapted (*ca*) temperature sensitive (*ts*) influenza virus  
486 vaccine has been licensed for use in humans since 1980<sup>34, 35</sup>.

487

488 A distinct advantage of targeting m<sup>6</sup>A sites for virus attenuation is that m<sup>6</sup>A-deficient  
489 hMPV mutants are capable of inducing a significantly higher type I IFN response compared to  
490 rhMPV. A higher IFN response will likely enhance adaptive immunity. Targeting different  
491 combinations of the many viral m<sup>6</sup>A sites could identify combinations with the optimal balance  
492 between attenuation and immunogenicity. A virus with mutations in multiple m<sup>6</sup>A sites would  
493 have enhanced genetic stability because reversion at any one site would have only a minor  
494 fitness gain. In fact, all m<sup>6</sup>A-deficient hMPV mutants were genetically stable; with no revertants  
495 or additional mutations detected after fifteen passages in A549 cells. In addition, m<sup>6</sup>A-deficient  
496 hMPV mutants grew to reasonably high titers in cell culture, especially in IFN-deficient cells,  
497 making vaccine production economically feasible. Thus, inhibition of viral m<sup>6</sup>A methylation is a  
498 novel approach to attenuating hMPV for the rational design of live attenuated vaccines.

499

500 In summary, we discovered that the presence of m<sup>6</sup>A in virion RNA serves as a molecular  
501 signature for discrimination of self from non-self RNA by the cytoplasmic RNA sensor RIG-I.  
502 This work highlights that possibility of using m<sup>6</sup>A as a novel approach for the development of  
503 antiviral drugs and live attenuated vaccines for pneumoviruses.

504

505

### References

- 506 1. Xue, M. *et al.* Viral N(6)-methyladenosine upregulates replication and pathogenesis of  
507 human respiratory syncytial virus. *Nat. Commun.* **10**, 4595 (2019).
- 508 2. Kolakofsky, D. & Bruschi, A. Antigenomes in Sendai virions and Sendai virus-infected  
509 cells. *Virology* **66**, 185-191 (1975).
- 510 3. Mottet, G. & Roux, L. Budding efficiency of Sendai virus nucleocapsids: influence of  
511 size and ends of the RNA. *Virus Res.* **14**, 175-187 (1989).
- 512
- 513 4. Green, T.J., Zhang, X., Wertz, G.W. & Luo, M. Structure of the vesicular stomatitis virus  
514 nucleoprotein-RNA complex. *Science* **313**, 357-360 (2006).

- 515 5. Myong, S. *et al.* Cytosolic viral sensor RIG-I is a 5'-triphosphate-dependent translocase  
516 on double-stranded RNA. *Science* **323**, 1070-1074 (2009).
- 517 6. Zheng, J. *et al.* HDX-MS reveals dysregulated checkpoints that compromise  
518 discrimination against self RNA during RIG-I mediated autoimmunity. *Nat. commun.* **9**,  
519 5366 (2018).
- 520 7. Devarkar, S.C., Schweibenz, B., Wang, C., Marcotrigiano, J. & Patel, S.S. RIG-I Uses an  
521 ATPase-Powered Translocation-Throttling Mechanism for Kinetic Proofreading of RNAs  
522 and Oligomerization. *Molecular Cell* **72**, 355-368 e354 (2018).
- 523 8. Hornung, V. *et al.* 5'-Triphosphate RNA is the ligand for RIG-I. *Science* **314**, 994-997  
524 (2006).
- 525 9. Hyde, J.L. & Diamond, M.S. Innate immune restriction and antagonism of viral RNA  
526 lacking 2-O methylation. *Virology* **479-480**, 66-74 (2015).
- 527 10. Jiang, F. *et al.* Structural basis of RNA recognition and activation by innate immune  
528 receptor RIG-I. *Nature* **479**, 423-427 (2011).
- 529 11. Kowalinski, E. *et al.* Structural basis for the activation of innate immune pattern-  
530 recognition receptor RIG-I by viral RNA. *Cell* **147**, 423-435 (2011).
- 531 12. Luo, D. *et al.* Structural insights into RNA recognition by RIG-I. *Cell* **147**, 409-422  
532 (2011).
- 533 13. Beckham, S.A. *et al.* Conformational rearrangements of RIG-I receptor on formation of a  
534 multiprotein:dsRNA assembly. *Nucleic Acids Res* **41**, 3436-3445 (2013).
- 535 14. Durbin, A.F., Wang, C., Marcotrigiano, J. & Gehrke, L. RNAs Containing Modified  
536 Nucleotides Fail To Trigger RIG-I Conformational Changes for Innate Immune Signaling.  
537 *MBio* **7** (2016).
- 538 15. Coots, R.A. *et al.* m(6)A Facilitates eIF4F-Independent mRNA Translation. *Molecular*  
539 *Cell* **68**, 504-514 e507 (2017).
- 540 16. Wang, X. *et al.* N6-methyladenosine-dependent regulation of messenger RNA stability.  
541 *Nature* **505**, 117-120 (2014).
- 542 17. Tan, B. *et al.* Viral and cellular N(6)-methyladenosine and N(6),2'-O-dimethyladenosine  
543 epitranscriptomes in the KSHV life cycle. *Nat. Microbiol.* **3**, 108-120 (2018).
- 544 18. Rubio, R.M., Depledge, D.P., Bianco, C., Thompson, L. & Mohr, I. RNA m(6) A  
545 modification enzymes shape innate responses to DNA by regulating interferon beta.  
546 *Genes & Development* **32**, 1472-1484 (2018).
- 547 19. Zheng, Q., Hou, J., Zhou, Y., Li, Z. & Cao, X. The RNA helicase DDX46 inhibits innate  
548 immunity by entrapping m(6)A-demethylated antiviral transcripts in the nucleus. *Nat.*  
549 *Immunol.* **18**, 1094-1103 (2017).
- 550 20. Winkler, R. *et al.* m(6)A modification controls the innate immune response to infection  
551 by targeting type I interferons. *Nat. Immunol.* **20**, 173-182 (2019).
- 552 21. Kolli, D., Bao, X. & Casola, A. Human metapneumovirus antagonism of innate immune  
553 responses. *Viruses* **4**, 3551-3571 (2012).
- 554 22. Cespedes, P.F., Palavecino, C.E., Kalergis, A.M. & Bueno, S.M. Modulation of Host  
555 Immunity by the Human Metapneumovirus. *Clin. Microbiol. Rev.* **29**, 795-818 (2016).
- 556 23. Bao, X. *et al.* Human metapneumovirus glycoprotein G inhibits innate immune responses.  
557 *PLoS Pathogens* **4**, e1000077 (2008).
- 558 24. Kolli, D. *et al.* Human metapneumovirus glycoprotein G inhibits TLR4-dependent  
559 signaling in monocyte-derived dendritic cells. *J. Immunol.* **187**, 47-54 (2011).



560 25. Biacchesi, S. *et al.* Recombinant human Metapneumovirus lacking the small hydrophobic  
561 SH and/or attachment G glycoprotein: deletion of G yields a promising vaccine candidate.  
562 *J. Virol.* **78**, 12877-12887 (2004).

563 26. Gokhale, N.S. *et al.* N6-Methyladenosine in Flaviviridae Viral RNA Genomes Regulates  
564 Infection. *Cell Host Microbe* **20**, 654-665 (2016).

565 27. Lichinchi, G. *et al.* Dynamics of Human and Viral RNA Methylation during Zika Virus  
566 Infection. *Cell Host & Microbe* **20**, 666-673 (2016).

567 28. van den Hoogen, B.G. *et al.* A newly discovered human pneumovirus isolated from  
568 young children with respiratory tract disease. *Nature medicine* **7**, 719-724 (2001).

569 29. Schildgen, V. *et al.* Human Metapneumovirus: lessons learned over the first decade. *Clin.*  
570 *Microbiol. Rev.* **24**, 734-754 (2011).

571 30. Yim, K.C. *et al.* Human metapneumovirus: enhanced pulmonary disease in cotton rats  
572 immunized with formalin-inactivated virus vaccine and challenged. *Vaccine* **25**, 5034-  
573 5040 (2007).

574 31. Zhang, Y. *et al.* Rational design of human metapneumovirus live attenuated vaccine  
575 candidates by inhibiting viral mRNA cap methyltransferase. *J. Virol.* **88**, 11411-11429  
576 (2014).

577 32. Buchholz, U.J., Nagashima, K., Murphy, B.R. & Collins, P.L. Live vaccines for human  
578 metapneumovirus designed by reverse genetics. *Expert Review of Vaccines* **5**, 695-706  
579 (2006).

580 33. Wen, S.C. & Williams, J.V. New Approaches for Immunization and Therapy against  
581 Human Metapneumovirus. *Clinical and Vaccine Immunology : CVI* **22**, 858-866 (2015).

582 34. Reeve, P., Almond, J.W., Felsenreich, V., Pibermann, M. & Maassab, H.F. Studies with a  
583 cold-recombinant A/Victoria/3/75 (H3N2) virus. I. biologic, genetic, and biochemical  
584 characterization. *J. Infect. Dis.* **142**, 850-856 (1980).

585 35. Murphy, B.R. *et al.* Cold-adapted variants of influenza A virus: evaluation in adult  
586 seronegative volunteers of A/Scotland/840/74 and A/Victoria/3/75 cold-adapted  
587 recombinants derived from the cold-adapted A/Ann Arbor/6/60 strain. *Infection and*  
588 *Immunity* **23**, 253-259 (1979).

589  
590
